# Supplementary material
Source: ML conference proceedings conference paper supplement (https://proceedings.neurips.cc/paper_files/paper/2010/hash/d86ea612dec96096c5e0fcc8dd42ab6d-Abstract.html)
Supplement: Supplementary file [file d86ea612dec96096c5e0fcc8dd42ab6d-Supplemental.zip]

---

# Inductive Regularized Learning of Kernel Functions: Supplementary Material

---

**Prateek Jain**  
Microsoft Research Bangalore  
Bangalore, India  
prajain@microsoft.com

**Brian Kulis**  
UC Berkeley EECS and ICSI  
Berkeley, CA, USA  
kulis@eecs.berkeley.edu

**Inderjit Dhillon**  
UT Austin Dept. of Computer Sciences  
Austin, TX, USA  
inderjit@cs.utexas.edu

## Appendix A

In this section we provide detailed proofs for Theorems 1-3.

Recall that our kernel matrix learning problem is given by

$$\min_{K_W \succeq 0} f(K^{-1/2} K_W K^{-1/2}) \quad \text{s.t. } g_i(K_W) \leq b_i, \quad 1 \leq i \leq m, \quad (1)$$

while our linear transformation kernel learning problem is given by

$$\min_{W \succeq 0} f(W) \quad \text{s.t. } g_i(\Phi^T W \Phi) \leq b_i, \quad 1 \leq i \leq m. \quad (2)$$

First we introduce and analyze an auxiliary optimization problem that will help in proving the main theorems. Consider the following problem:

$$\begin{aligned} \min_{W \succeq 0, L} \quad & f(W) \\ \text{s.t.} \quad & g_i(\Phi^T W \Phi) \leq b_i, \quad 1 \leq i \leq m, \\ & W = \alpha I^d + U L U^T, \end{aligned} \quad (3)$$

where  $L \in \mathbb{R}^{k \times k}$ ,  $U \in \mathbb{R}^{d \times k}$  is an orthogonal matrix, and  $I^d$  is the  $d \times d$  identity matrix. In general,  $k$  can be significantly smaller than  $\min(n, d)$ . Note that the above problem is identical to (2) except for an added constraint  $W = \alpha I^d + U L U^T$ . We now show that (3) is equivalent to a problem over  $k \times k$  matrices. In particular, (3) is equivalent to (4) defined below.

**Lemma 1.** *Let  $f$  be a spectral function (see Definition 3.1) and let  $\alpha$  be the global minima for the corresponding scalar function  $f_s$ . Then, (3) is equivalent to:*

$$\begin{aligned} \min_L \quad & f(\alpha I^k + L), \\ \text{s.t.} \quad & g_i(\alpha \Phi^T \Phi + \Phi^T U L U^T \Phi) \leq b_i, \quad 1 \leq i \leq m, \\ & L \succeq -\alpha I^k. \end{aligned} \quad (4)$$

*Proof.* The last constraint in (3) asserts that  $W = \alpha I^d + U L U^T$ , which implies that there is a one-to-one mapping between  $W$  and  $L$ : given  $W$ ,  $L$  can be computed and vice-versa. As a result, we

can eliminate the variable  $W$  from (3) by substituting  $\alpha I^d + ULU^T$  for  $W$  (via the last constraint in (3)). The resulting optimization problem is:

$$\begin{aligned} \min_L \quad & f(\alpha I + ULU^T), \\ \text{s.t.} \quad & g_i(\alpha \Phi^T \Phi + \Phi^T ULU^T \Phi) \leq b_i, \quad 1 \leq i \leq m, \\ & L \succeq -\alpha I^k. \end{aligned} \quad (5)$$

Note that (4) and (5) are the same except for their objective functions. Below, we show that both the objective functions are equal up to a constant, so they are interchangeable in the optimization problem. Let  $U' \in \mathbb{R}^{d \times d}$  be an orthonormal matrix obtained by completing the basis represented by  $U$ , i.e.,  $U' = [U \ U_\perp]$  for some  $U_\perp \in \mathbb{R}^{d \times (d-k)}$  s.t.  $U^T U_\perp = 0$  and  $U_\perp^T U_\perp = I^{d-k}$ . Now,

$$W = \alpha I + ULU^T = U' \left( \alpha I + \begin{bmatrix} L & 0 \\ 0 & 0 \end{bmatrix} \right) U'^T. \quad (6)$$

It is straightforward to see that for a spectral function  $f$ ,

$$f(VWV^T) = f(W), \quad (7)$$

where  $V$  is an orthogonal matrix. Also,  $\forall A, B \in \mathbb{R}^{d \times d}$ ,

$$f \begin{pmatrix} A & 0 \\ 0 & B \end{pmatrix} = f(A) + f(B). \quad (8)$$

Using (6), (7), and (8), we get:

$$\begin{aligned} f(W) &= f(\alpha I + ULU^T) = \left( \alpha U'^T I U' + \begin{bmatrix} L & 0 \\ 0 & 0 \end{bmatrix} \right), \\ &= f \left( \begin{bmatrix} \alpha I + L & 0 \\ 0 & \alpha I \end{bmatrix} \right), \\ &= f(\alpha I + L) + (d - n)f(\alpha), \end{aligned} \quad (9)$$

Therefore, the objective functions of (4) and (5) differ by only a constant, i.e., they are equivalent w.r.t. the optimization problem. The lemma follows.  $\square$

We now show that for the convex spectral functions (see Definition 3.1) the optimal solution  $W^*$  to (2) is of the form  $W^* = I + \Phi S \Phi^T$ , for some  $S$ .

**Lemma 2.** Suppose  $f$  satisfies the conditions given in Theorem 1. Furthermore, denote the global minima of the corresponding scalar function  $f_s$  as  $\alpha$ . Then, the optimal solution to (2) is of the form  $W^* = \alpha I + \Phi S \Phi^T$ , where  $S$  is a  $n \times n$  matrix.

*Proof.* Let  $W = U \Lambda U^T = \sum_j \lambda_j \mathbf{u}_j \mathbf{u}_j^T$  be the eigenvalue decomposition of  $W$ . Consider a constraint  $g_i(\Phi^T W \Phi) \leq b_i$  as specified in (2). Note that if the  $j$ -th eigenvector  $\mathbf{u}_j$  of  $W$  is orthogonal to the range space of  $\Phi$ , i.e.  $\Phi^T \mathbf{u}_j = 0$ , then the corresponding eigenvalue  $\lambda_j$  is not constrained (except for the non-negativity constraint imposed by the positive semi-definiteness constraint). Since the range space of  $\Phi$  is at most  $n$ -dimensional, without loss of generality we can assume that  $\lambda_j \geq 0, \forall j > n$  are not constrained by the linear inequality constraints in (2).

Since  $f$  satisfies the conditions of Theorem 1,  $f(W) = \sum_j f_s(\lambda_j)$ . Also,  $f_s(\alpha) = \min_x f_s(x)$ . Hence, to minimize  $f(W)$ , we can select  $\lambda_j^* = \alpha \geq 0, \forall j > n$  (note that the non-negativity constraint is satisfied for this choice of  $\lambda_j$ ). Furthermore, the eigenvectors  $\mathbf{u}_j, \forall j \leq n$ , lie in the range space of  $X$ , i.e.,  $\forall j \leq n, \mathbf{u}_j = X \mathbf{z}_j$  for some  $\mathbf{z}_j \in \mathbb{R}^n$ . Therefore,

$$\begin{aligned} W^* &= \sum_{j=1}^n \lambda_j^* \mathbf{u}_j^* \mathbf{u}_j^{*T} + \alpha \sum_{j=n+1}^d \mathbf{u}_j^* \mathbf{u}_j^{*T}, \\ &= \sum_{j=1}^n (\lambda_j^* - \alpha) \mathbf{u}_j^* \mathbf{u}_j^{*T} + \alpha \sum_{j=1}^d \mathbf{u}_j^* \mathbf{u}_j^{*T}, \\ &= \Phi S^* \Phi^T + \alpha I, \end{aligned}$$

where  $S^* = \sum_{j=1}^n (\lambda_j^* - \alpha) \mathbf{z}_j^* \mathbf{z}_j^{*T}$ .  $\square$

Now we use Lemmas 1 and 2 to prove Theorem 1.

*Proof of Theorem 1.* Let  $\Phi = U_\Phi \Sigma V_\Phi^T$  be the singular value decomposition (SVD) of  $\Phi$ . Note that

$$K = \Phi^T \Phi = V_\Phi \Sigma^2 V_\Phi^T.$$

Also, assuming  $\Phi \in \mathbb{R}^{d \times n}$  to be full-rank and  $d > n$ ,  $V_\Phi V_\Phi^T = I$ .

Using Lemma 2, the optimal solution to (2) is restricted to be of the form  $W = \alpha I + \Phi S \Phi^T = \alpha I + U_\Phi \Sigma V_\Phi^T S V_\Phi \Sigma U_\Phi^T = \alpha I + U_\Phi V_\Phi^T K^{1/2} S K^{1/2} V_\Phi U_\Phi^T = \alpha I + U_\Phi V_\Phi^T L V_\Phi U_\Phi^T$ , where  $L = K^{1/2} S K^{1/2}$ . Hence, for spectral functions  $f$ , (2) is equivalent to (3), so using Lemma 1, (2) is equivalent to (4) with  $U = U_\Phi V_\Phi^T$  and  $L = K^{1/2} S K^{1/2}$ . Also, note that the constraints in (4) can be simplified to:

$$g_i(\alpha \Phi^T \Phi + \Phi^T U L U^T \Phi) \leq b_i \equiv g_i(\alpha K + K^{1/2} L K^{1/2}) \leq b_i.$$

Now, let  $K_W = \alpha K + K^{1/2} L K^{1/2} = \alpha K + K S K$ , i.e.,  $L = K^{-1/2}(K_W - \alpha K)K^{-1/2}$ . Theorem 1 now follows by substituting for  $L$  in (4).  $\square$

Next, we prove Theorem 2.

*Proof of Theorem 2.* Let  $U = K^{1/2} J (J^T K J)^{-1/2}$  and let  $J$  be a full rank matrix, then  $U$  is an orthogonal matrix. Using (9) we get,

$$f(\alpha I + U (J^T K J)^{1/2} L (J^T K J)^{1/2} U^T) = f(\alpha I + (J^T K J)^{1/2} L (J^T K J)^{1/2}).$$

Now consider a linear constraint specified in (6) (from main text),  $\text{Tr}(C_i(\alpha K + K J L J^T K)) \leq b_i$ . This can be easily simplified to:

$$\text{Tr}(L J^T K C_i K J) \leq b_i - \text{Tr}(\alpha K C_i).$$

Similar simple algebraic manipulations to the PSD constraint completes the proof.  $\square$

Finally, we prove Theorem 3.

*Proof of Theorem 3.* Consider the last constraint in (7) (from main text):

$$W = \alpha I + \Phi J L J \Phi^T.$$

Let  $\Phi = U \Sigma V^T$  be the SVD of  $\Phi$ . Hence,  $W = \alpha I + U V^T V \Sigma V^T J L J V \Sigma V^T V U^T = \alpha I + U V^T K^{1/2} J L J K^{1/2} V U^T$ . For disambiguity, rename  $L$  as  $L'$  and  $U$  as  $U'$ . Now, clearly (7) (from main text) is same as (3) with  $U = U' V^T$  and  $L = K^{1/2} J L' J K^{1/2}$ . Theorem 3 now follows by using Lemma 1 with  $L = K^{1/2} J L' J K^{1/2}$ .  $\square$

## Appendix B: Trace-SSIKDR

To recap, the updates for solving (11) (from main text) using Uzawa's algorithm are given by:

$$U \Sigma U^T \leftarrow K^{1/2} C K^{1/2}, \quad (10)$$

$$\tilde{K}^t \leftarrow U \max(\Sigma - \tau I, 0) U^T, \quad (11)$$

$$z_i^t \leftarrow z_i^{t-1} - \delta \max(\text{Tr}(C_i K^{1/2} \tilde{K}^t K^{1/2}) - b_i, 0), \forall i, \quad (12)$$

where  $C = \sum_i z_i^{t-1} C_i$ . We first prove a technical lemma to relate eigenvectors  $U$  of matrix  $K^{1/2} C K^{1/2}$  and  $V$  of the matrix  $CK$ .

**Lemma 3.** Let  $K^{1/2} C K^{1/2} = U_k \Sigma_k U_k^T$ , where  $U_k$  contains the top- $k$  eigenvectors of  $K^{1/2} C K^{1/2}$  and  $\Sigma_k$  contains the top- $k$  eigenvalues of  $K^{1/2} C K^{1/2}$ . Similarly, let  $CK = V_k \Lambda_k V_k^{-1}$ , where  $V_k$  contains the top- $k$  right eigenvectors of  $CK$  and  $\Lambda_k$  contains the top- $k$  eigenvalues of  $CK$ . Then,

$$U_k = K^{1/2} V_k D_k,$$

$$\Sigma_k = \Lambda_k.$$

Note that eigenvalue decomposition is unique up to sign, so we assume that the sign has been set correctly.

*Proof.* Let  $\mathbf{v}_i$  be  $i$ -th eigenvector of  $CK$ . Then,  $CK\mathbf{v}_i = \lambda_i\mathbf{v}_i$ . Multiplying both sides with  $K^{1/2}$ , we get  $K^{1/2}CK^{1/2}K^{1/2}\mathbf{v}_i = K^{1/2}\mathbf{v}_i$ . After normalization we get:

$$(K^{1/2}CK^{1/2})\frac{K^{1/2}\mathbf{v}_i}{\mathbf{v}_i^T K \mathbf{v}_i} = \lambda_i \frac{K^{1/2}\mathbf{v}_i}{\mathbf{v}_i^T K \mathbf{v}_i}$$

Hence,  $\frac{K^{1/2}\mathbf{v}_i}{\mathbf{v}_i^T K \mathbf{v}_i} = K^{1/2}\mathbf{v}_i/D(i, i)$  is the  $i$ -th eigenvector  $\mathbf{u}_i$  of  $K^{1/2}CK^{1/2}$ . Also,  $\sigma_i = \lambda_i$ .  $\square$

Using the above lemma and (11), we get

$$\tilde{K} = K^{1/2}V_k D_k \lambda D_k V_k^{-1} K^{1/2}.$$

Therefore, the update for the  $z$  variables (see (12)) reduces to:

$$z_i^t \leftarrow z_i^{t-1} - \delta \max(\text{Tr}(C_i K V_k D_k \lambda D_k V_k^{-1} K) - b_i, 0), \forall i.$$

This proves that step 6 of Algorithm 1 is correct, so we do not need to compute the full eigenvalue decomposition or square-root of the kernel matrix  $K$ .
